# Supplementary material for: Molecular mechanism of c‐Myc and PRPS1/2 against thiopurine resistance in Burkitt's lymphoma
Source: PubMed Central journal article supplement (PMC7299692; doi:10.1111/jcmm.15322), 2020-05-11

Fig.S1

a

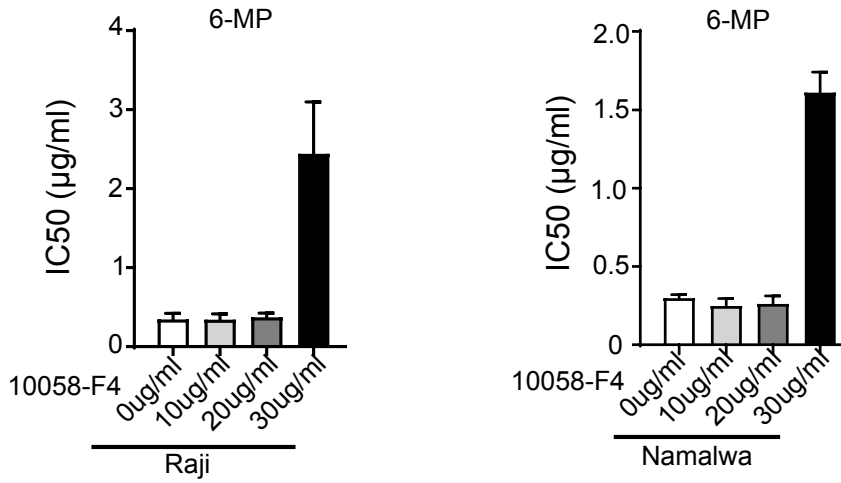

b

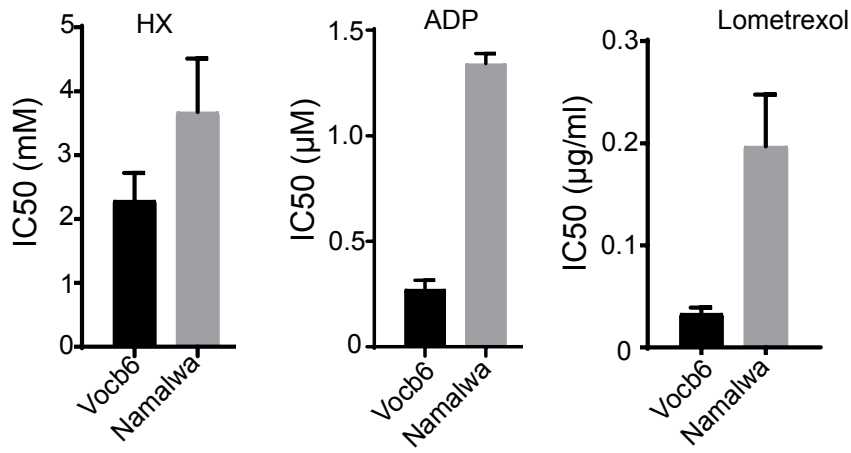

c

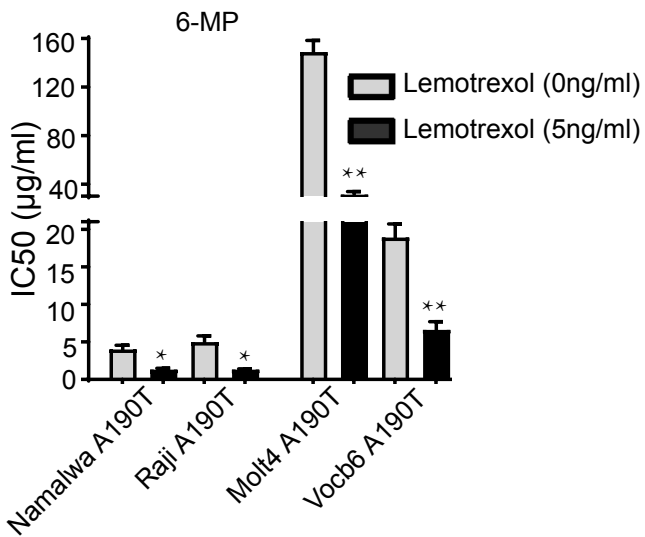

d

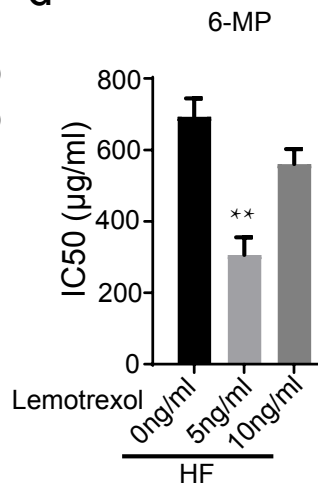

Supplement: JCMM-24-6704-s001.pdf [file JCMM-24-6704-s001.pdf]
